# Supplementary material for: Relationship of Hematological Profiles with the Serum Complement System in Patients with Systemic Lupus Erythematosus
Source: MDPI journal article supplement (doi:10.3390/biomedicines12050967), 2024-04-27
Supplement: s1 [file s1]

Supplementary Table S1. Complement system and hematological cell count values.

|                                                  | SLE patients<br>(n=284) |
|--------------------------------------------------|-------------------------|
| Hematological cells count                        |                         |
| Red blood cells, x10e6/mm3                       | 4.44 ± 0.43             |
| Hemoglobin, g/dL                                 | 13.2 ± 1.3              |
| Hematocrit, %                                    | 40.1 ± 3.7              |
| Mean corpuscular volume, fL                      | 90.6 ± 6.1              |
| Mean corpuscular hemoglobin, pg                  | 29.9 ± 2.5              |
| Mean corpuscular hemoglobin concentration, g/dl  | 33.0 ± 1.2              |
| Red Cell Distribution Width, %                   | 13.8 ± 2.1              |
| Leucocytes / mm3                                 | 6042 ± 2276             |
| Neutrophils / mm3                                | 3524 ± 1733             |
| Lymphocytes / mm3                                | 1787 ± 957              |
| Monocytes / mm3                                  | 548 ± 208               |
| Eosinophils / mm3                                | 70 (30-140)             |
| Basophils / mm3                                  | 40 (20-100)             |
| Platelets x10e3 / mm3                            | 237 ± 79                |
| Mean platelet volume, fL                         | 9.6 ± 1.6               |
| Complement system functional assays and proteins |                         |
| Functional assays, %                             |                         |
| Classical pathway                                | 91 ± 38                 |
| Alternative pathway                              | 41 (12-79)              |
| Lectin pathway                                   | 10 (1-41)               |
| Individual complement components                 |                         |
| C1q, mg/dl                                       | 34 ± 11                 |
| C2, mg/dl                                        | 2.5 ± 1.2               |
| C4, mg/dl                                        | 21 ± 12                 |
| Factor D, ng/ml                                  | 2593 ± 1835             |
| C3, mg/dl                                        | 130 ± 40                |
| C3a, mg/dl                                       | 39 ± 10                 |
| C1 inhibitor, mg/dl                              | 32 ± 9                  |
| Factor H, ng/ml x10e-3                           | 388 (281-564)           |

Supplementary Table S2. Correlations between hematological cells and complement functional pathways and products

|                       |     | Classical      |               | Lectin  | Classical and lectin |               |                | Alternative    |                | Classical, alternative and lectin |               |                |
|-----------------------|-----|----------------|---------------|---------|----------------------|---------------|----------------|----------------|----------------|-----------------------------------|---------------|----------------|
|                       |     | %              | C1q           | %       | C2                   | C4            | C1-inh         | %              | Factor D       | C3                                | C3a           | Factor H       |
| Red cells, x10e6/mm3  | Rho | 0.0691         | 0.0461        | -0.0229 | 0.0048               | -0.0342       | <b>0.1630</b>  | 0.0206         | -0.1169        | 0.0627                            | 0.0939        | -0.1026        |
|                       | p   | 0.2672         | 0.4573        | 0.7126  | 0.9382               | 0.5928        | <b>0.0137</b>  | 0.7409         | 0.0902         | 0.3244                            | 0.1289        | 0.1373         |
| Hemoglobin, g/dL      | Rho | 0.0463         | <b>0.1554</b> | -0.0411 | 0.0903               | 0.0389        | 0.0404         | 0.0931         | -0.0167        | 0.0953                            | 0.0505        | -0.0529        |
|                       | p   | 0.4571         | <b>0.0118</b> | 0.5091  | 0.1417               | 0.5426        | 0.5443         | 0.1342         | 0.8092         | 0.1335                            | 0.4145        | 0.4444         |
| Hematocrit, %         | Rho | 0.0782         | 0.1034        | -0.0484 | 0.0632               | 0.0153        | 0.0641         | 0.0388         | -0.0595        | 0.0674                            | 0.0531        | -0.0792        |
|                       | p   | 0.2088         | 0.0948        | 0.4373  | 0.3046               | 0.8114        | 0.3354         | 0.5332         | 0.3897         | 0.2893                            | 0.3907        | 0.2522         |
| MCV, fL               | Rho | 0.0216         | 0.0463        | -0.0306 | 0.0321               | 0.0470        | <b>-0.1601</b> | 0.0652         | 0.0428         | 0.0072                            | -0.0840       | 0.0165         |
|                       | p   | 0.7283         | 0.4559        | 0.6231  | 0.6024               | 0.4624        | <b>0.0156</b>  | 0.2949         | 0.5366         | 0.9096                            | 0.1746        | 0.8113         |
| MCH, pg               | Rho | -0.0481        | 0.0720        | -0.0271 | 0.0439               | 0.0506        | <b>-0.1433</b> | 0.0958         | 0.0622         | 0.0406                            | -0.0677       | 0.0802         |
|                       | p   | 0.4398         | 0.2453        | 0.6634  | 0.4755               | 0.4284        | <b>0.0305</b>  | 0.1235         | 0.3685         | 0.5235                            | 0.2739        | 0.2459         |
| MCHC, g/dl            | Rho | <b>-0.1280</b> | 0.0911        | 0.0080  | 0.0658               | 0.0283        | -0.0262        | <b>0.1252</b>  | 0.1017         | 0.0726                            | -0.0056       | 0.1310         |
|                       | p   | <b>0.0391</b>  | 0.1415        | 0.8981  | 0.2853               | 0.6578        | 0.6938         | <b>0.0437</b>  | 0.1410         | 0.2538                            | 0.9280        | 0.0574         |
| RDW, %                | Rho | <b>0.1461</b>  | -0.0315       | 0.0468  | 0.0578               | -0.0040       | <b>0.1704</b>  | <b>-0.1544</b> | -0.0418        | -0.0200                           | 0.1070        | <b>-0.1522</b> |
|                       | p   | <b>0.0185</b>  | 0.6117        | 0.4522  | 0.3480               | 0.9498        | <b>0.0099</b>  | <b>0.0127</b>  | 0.5463         | 0.7534                            | 0.0833        | <b>0.0271</b>  |
| Leucocytes / mm3      | Rho | <b>0.1783</b>  | 0.0327        | 0.1168  | 0.1162               | <b>0.1577</b> | <b>0.1861</b>  | <b>0.2360</b>  | 0.0165         | <b>0.2104</b>                     | <b>0.1597</b> | -0.0337        |
|                       | p   | <b>0.0039</b>  | 0.5983        | 0.0600  | 0.0584               | <b>0.0131</b> | <b>0.0048</b>  | <b>0.0001</b>  | 0.8114         | <b>0.0008</b>                     | <b>0.0095</b> | 0.6269         |
| Neutrophils / mm3     | Rho | 0.1133         | 0.0314        | 0.0591  | 0.0872               | 0.0961        | <b>0.2254</b>  | <b>0.1404</b>  | -0.0166        | <b>0.1634</b>                     | <b>0.1299</b> | -0.0246        |
|                       | p   | 0.0681         | 0.6130        | 0.3421  | 0.1562               | 0.1322        | <b>0.0006</b>  | <b>0.0235</b>  | 0.8108         | <b>0.0098</b>                     | <b>0.0352</b> | 0.7222         |
| Lymphocytes / mm3     | Rho | <b>0.1601</b>  | 0.0079        | 0.1065  | <b>0.1440</b>        | <b>0.2403</b> | 0.0769         | <b>0.3054</b>  | 0.0572         | <b>0.2193</b>                     | <b>0.1443</b> | -0.0019        |
|                       | p   | <b>0.0097</b>  | 0.8983        | 0.0866  | <b>0.0188</b>        | <b>0.0001</b> | 0.2477         | <b>0.0000</b>  | 0.4081         | <b>0.0005</b>                     | <b>0.0192</b> | 0.9777         |
| Monocytes / mm3       | Rho | 0.1189         | -0.0460       | 0.0539  | 0.0982               | 0.1054        | <b>0.1309</b>  | <b>0.1244</b>  | -0.0287        | <b>0.1385</b>                     | 0.0986        | <b>-0.1397</b> |
|                       | p   | 0.0555         | 0.4588        | 0.3872  | 0.1100               | 0.0983        | <b>0.0484</b>  | <b>0.0451</b>  | 0.6782         | <b>0.0289</b>                     | 0.1107        | <b>0.0426</b>  |
| Eosinophils / mm3     | Rho | <b>0.1801</b>  | 0.0711        | 0.0862  | 0.0621               | <b>0.1277</b> | <b>0.1856</b>  | -0.0829        | <b>-0.1689</b> | <b>0.1604</b>                     | <b>0.1472</b> | <b>-0.2633</b> |
|                       | p   | <b>0.0036</b>  | 0.2515        | 0.1658  | 0.3128               | <b>0.0449</b> | <b>0.0049</b>  | 0.1825         | <b>0.0140</b>  | <b>0.0113</b>                     | <b>0.0169</b> | <b>0.0001</b>  |
| Basophils / mm3       | Rho | -0.0506        | -0.0541       | 0.0025  | -0.0066              | 0.1029        | <b>-0.1352</b> | <b>0.3763</b>  | 0.0830         | <b>0.1310</b>                     | -0.0239       | 0.1039         |
|                       | p   | 0.4161         | 0.3829        | 0.9680  | 0.9151               | 0.1067        | <b>0.0413</b>  | <b>0.0000</b>  | 0.2302         | <b>0.0388</b>                     | 0.6992        | 0.1326         |
| Platelets x10e3 / mm3 | Rho | -0.0312        | -0.0436       | -0.0231 | <b>0.1475</b>        | <b>0.1347</b> | 0.0402         | -0.0375        | -0.0899        | <b>0.1700</b>                     | 0.0879        | -0.0006        |
|                       | p   | 0.6166         | 0.4820        | 0.7103  | <b>0.0161</b>        | <b>0.0344</b> | 0.5460         | 0.5473         | 0.1934         | <b>0.0072</b>                     | 0.1553        | 0.9930         |
| MPV, fL               | Rho | 0.0061         | -0.0228       | 0.1451  | <b>-0.2070</b>       | -0.1139       | <b>-0.1771</b> | -0.0191        | -0.0906        | -0.0698                           | 0.0410        | -0.1595        |
|                       | p   | 0.9369         | 0.7647        | 0.0597  | <b>0.0057</b>        | 0.1416        | <b>0.0313</b>  | 0.8049         | 0.2944         | 0.3658                            | 0.5915        | 0.0636         |

Significant p values are depicted in bold. Correlation Spearman Rho coefficients are shown.

Supplementary Table S3. Multivariable analysis of the relation of lymphocytes, neutrophils, hemoglobin and platelets with complement system

|             | Beta coefficient (95% confidence interval), p |                        |                                   |                               |                          |                         |
|-------------|-----------------------------------------------|------------------------|-----------------------------------|-------------------------------|--------------------------|-------------------------|
|             | Classical                                     |                        | Lectin                            | Classical and lectin          |                          |                         |
|             | %                                             | C1q                    | %                                 | C2                            | C4                       | C1-inh                  |
|             |                                               |                        |                                   |                               |                          |                         |
| Hemoglobin  |                                               |                        |                                   |                               |                          |                         |
| 1st tercile | -                                             | -                      | -                                 | -                             | -                        | -                       |
| 2nd tercile | <b>12 (0.5-24), 0.040</b>                     | <b>4 (1-7), 0.009</b>  | <b>17 (4-30), 0.011</b>           | <b>0.5 (-0.1-0.8), 0.006</b>  | 2 (-2-6), 0.29           | 2 (-1-5), 0.32          |
| 3rd tercile | 7 (-5-20), 0.23                               | <b>5 (1-8), 0.009</b>  | 0.05 (-14-14), 0.99               | <b>0.4 (0.03-0.8), 0.033</b>  | 2 (-3-6), 0.45           | 2 (-2-5), 0.33          |
| Leucocytes  |                                               |                        |                                   |                               |                          |                         |
| 1st tercile | -                                             | -                      | -                                 | -                             | -                        | -                       |
| 2nd tercile | 6 (-6-17), 0.32                               | 1 (-2-4), 0.53         | 11 (-3-24), 0.12                  | 0.2 (-0.2-0.6), 0.27          | <b>4 (0.2-8), 0.037</b>  | <b>4 (0.5-7), 0.024</b> |
| 3rd tercile | 11 (-0.6-23), 0.063                           | -1 (-5-2), 0.41        | 14 (0.03-27), 0.050               | 0.1 (-0.2-0.5), 0.44          | <b>4 (0.05-8), 0.047</b> | <b>4 (0.9-7), 0.011</b> |
| Neutrophils |                                               |                        |                                   |                               |                          |                         |
| 1st tercile | -                                             | -                      | -                                 | -                             | -                        | -                       |
| 2nd tercile | -3 (-15-9), 0.60                              | 1 (-2-4), 0.57         | 2 (-12-15), 0.82                  | 0.06 (-0.3-0.4), 0.75         | 3 (-0.8-7), 0.12         | <b>4 (1-7), 0.006</b>   |
| 3rd tercile | 6 (-6-18), 0.32                               | -0.5 (-4-3), 0.76      | 9 (-5-22), 0.20                   | 0.2 (-0.1-0.6), 0.23          | 3 (-17), 0.14            | <b>5 (2-8), 0.001</b>   |
| Lymphocytes |                                               |                        |                                   |                               |                          |                         |
| 1st tercile | -                                             | -                      | -                                 | -                             | -                        | -                       |
| 2nd tercile | <b>16 (5-28), 0.007</b>                       | 3 (-0.2-6), 0.069      | 5 (-8-19), 0.44                   | <b>0.5 (-0.1-0.08), 0.008</b> | <b>4 (0.06-8), 0.047</b> | 0.8 (-2-4), 0.62        |
| 3rd tercile | <b>18 (6-30), 0.004</b>                       | 0.3 (-3-4), 0.86       | 9 (-5-23), 0.18                   | <b>0.4 (0.01-0.8), 0.042</b>  | <b>5 (1-9), 0.010</b>    | 2 (-2-5), 0.34          |
| Monocytes   |                                               |                        |                                   |                               |                          |                         |
| 1st tercile | -                                             | -                      | -                                 | -                             | -                        | -                       |
| 2nd tercile | -1 (-13-10), 0.81                             | -0.09 (-3-2), 0.96     | 0.3 (-13-14), 0.96                | 0.09 (-0.3-0.4), 0.61         | 4 (-0.4-7), 0.076        | 3 (-0.3-6), 0.077       |
| 3rd tercile | 8 (-4-19), 0.21                               | -2 (-5-2), 0.31        | 4 (-9-18), 0.52                   | 0.3 (-0.07-0.7), 0.11         | 3 (-0.6-7), 0.093        | <b>5 (2-8), 0.002</b>   |
| Platelets   |                                               |                        |                                   |                               |                          |                         |
| 1st tercile | -                                             | -                      | -                                 | -                             | -                        | -                       |
| 2nd tercile | -4 (-16-7), 0.48                              | -2 (-5-1), 0.19        | -4 (-18-9), 0.52                  | 0.1 (-0.2-0.5), 0.50          | 0.4 (-3-4), 0.82         | 0.9 (-2-4), 0.54        |
| 3rd tercile | -9 (-21-3), 0.14                              | -2 (-6-0.9), 0.15      | 0.8 (-13-14), 0.91                | <b>0.4 (0.07-0.8), 0.018</b>  | 4 (-0.04-8), 0.053       | 2 (-1-5), 0.18          |
|             | Alternative                                   |                        | Classical, alternative and lectin |                               |                          |                         |
|             | %                                             | Factor D               | C3                                | C3a                           | Factor H x10e-3          |                         |
|             |                                               |                        |                                   |                               |                          |                         |
|             |                                               |                        |                                   |                               |                          |                         |
| Hemoglobin  |                                               |                        |                                   |                               |                          |                         |
| 1st tercile | -                                             | -                      | -                                 | -                             | -                        | -                       |
| 2nd tercile | 5 (-6-17), 0.37                               | -626 (-1271-19), 0.057 | 13 (0.6-26), 0.041                | 3 (-0.02-6), 0.052            | -126 (-366-115), 0.30    |                         |
| 3rd tercile | 8 (-4-21), 0.20                               | -403 (-1100-293), 0.25 | 12 (-1-26), 0.074                 | 1 (-2-5), 0.44                | -76 (-335-184), 0.57     |                         |

|             |                              |                            |                           |                    |                      |
|-------------|------------------------------|----------------------------|---------------------------|--------------------|----------------------|
| Leucocytes  |                              |                            |                           |                    |                      |
| 1st tercile | -                            | -                          | -                         | -                  | -                    |
| 2nd tercile | <b>8 (-4-19), 0.20</b>       | <b>87 (-587-762), 0.80</b> | <b>17 (5-30), 0.007</b>   | 3 (0.06-6), 0.046  | 11 (-242-264), 0.93  |
| 3rd tercile | <b>18 (6-30), 0.004</b>      | <b>678 (6-1350), 0.048</b> | <b>15 (2-28), 0.024</b>   | 2 (-1-6), 0.16     | 64 (-187-316), 0.62  |
| Neutrophils |                              |                            |                           |                    |                      |
| 1st tercile | -                            | -                          | -                         | -                  | -                    |
| 2nd tercile | <b>3 (-9-15), 0.62</b>       | 182 (-496-859), 0.60       | 14 (1-26), 0.036          | 2 (-2-5), 0.34     | -197 (-446-53), 0.12 |
| 3rd tercile | <b>13 (1-25), 0.030</b>      | 343 (-324-1011), 0.31      | 9 (-3-22), 0.14           | 3 (-0.3-6), 0.071  | -41 (-286-205), 0.75 |
| Lymphocytes |                              |                            |                           |                    |                      |
| 1st tercile | -                            | -                          | -                         | -                  | -                    |
| 2nd tercile | <b>18 (7-30), 0.002</b>      | -405 (-1068-259), 0.23     | <b>9 (-4-22), 0.17</b>    | 2 (-2-5), 0.31     | -96 (-342-151), 0.44 |
| 3rd tercile | <b>24 (12-36), &lt;0.001</b> | 334 (-359-1027), 0.34      | <b>17 (4-31), 0.010</b>   | 3 (-0.06-7), 0.055 | 141 (-116-399), 0.28 |
| Monocytes   |                              |                            |                           |                    |                      |
| 1st tercile | -                            | -                          | -                         | -                  | -                    |
| 2nd tercile | 9 (-3-20), 0.15              | -77 (-723-569), 0.81       | 11 (-2-24), 0.086         | 0.2 (-3-3), 0.92   | -71 (-313-170), 0.56 |
| 3rd tercile | 10 (-2-22), 0.098            | 648 (-19-1314), 0.057      | 13 (-0.1-26), 0.052       | 3 (-0.7-6), 0.13   | 73 (-176-322), 0.57  |
| Platelets   |                              |                            |                           |                    |                      |
| 1st tercile | -                            | -                          | -                         | -                  | -                    |
| 2nd tercile | -4 (-15-8), 0.54             | 89 (-574-752), 0.79        | 9 (-3-21), 0.15           | 3 (-0.2-6), 0.071  | 54 (-192-299), 0.67  |
| 3rd tercile | -4 (-16-8), 0.48             | 162 (-513-838), 0.44       | <b>13 (0.5-26), 0.041</b> | 2 (-1-5), 0.27     | 10 (-240-259), 0.94  |

First tercile is considered the reference variable and complement functional test and proteins are the dependent variables. Significant p values are depicted in bold.

Beta coefficients are adjusted for age, sex, SLICC and SLEDAI scores, and the intake of aspirin, prednisone, methotrexate, azathioprine and mofetil mycophenolate.

SLEDAI covariable in this analysis does not contain the complement, thrombopenia, leukopenia and antiDNA items.

Supplementary Table S4. Multivariable relation of citopenias to the presence of anemia, leukopenia, neutropenia, lymphopenia and thrombocytopenia

|                                   | Anemia           |                  | Leukopenia       |              |                 |                 | Neutropenia  |              |                |                |              |              |
|-----------------------------------|------------------|------------------|------------------|--------------|-----------------|-----------------|--------------|--------------|----------------|----------------|--------------|--------------|
|                                   | No=231           | Yes=39           | p                | p*           | No= 218         | Yes=52          | p            | p*           | No= 255        | Yes=15         | p            | p*           |
| Classical pathway                 |                  |                  |                  |              |                 |                 |              |              |                |                |              |              |
| %                                 | 92 ± 2           | 84 ± 45          | 0.29             | 0.088        | 93 ± 38         | 83 ± 38         | 0.11         | 0.11         | 91 ± 38        | 87 ± 42        | 0.66         | 0.64         |
| C1q, mg/dl                        | 34 ± 10          | 32 ± 12          | 0.32             | 0.092        | 34 ± 10         | 33 ± 11         | 0.64         | 0.88         | 34 ± 11        | 33 ± 10        | 0.83         | 0.75         |
| Lectin pathway                    |                  |                  |                  |              |                 |                 |              |              |                |                |              |              |
| %                                 | 33 (28-38)       | 32 (26-34)       | 0.76             | 0.58         | 13 (1-49)       | 6 (1-27)        | 0.12         | 0.17         | 12 (1-44)      | 10 (2-34)      | 0.49         | 0.44         |
| Classical and alternative         |                  |                  |                  |              |                 |                 |              |              |                |                |              |              |
| C2, mg/dl                         | <b>2.5 ± 1.1</b> | <b>2.2 ± 1.2</b> | <b>0.073</b>     | <b>0.010</b> | 2.5 ± 1.1       | 2.2 ± 1.1       | 0.12         | 0.18         | 2.4 ± 1.1      | 2.6 ± 1.5      | 0.62         | 0.77         |
| C4, mg/dl                         | 21 ± 12          | 19 ± 10          | 0.22             | 0.093        | 21 ± 12         | 19 ± 12         | 0.17         | 0.20         | 21 ± 12        | 24 ± 16        | 0.28         | 0.27         |
| C1-inh, mg/dl                     | 32 ± 9           | 30 ± 9           | 0.26             | 0.11         | 32 ± 9          | 30 ± 7          | 0.15         | 0.12         | 32 ± 9         | 28 ± 7         | 0.14         | 0.13         |
| Alternative                       |                  |                  |                  |              |                 |                 |              |              |                |                |              |              |
| %                                 | 48 ± 38          | 45 ± 38          | 0.59             | 0.79         | <b>50 ± 38</b>  | <b>36 ± 35</b>  | <b>0.014</b> | <b>0.022</b> | <b>49 ± 37</b> | <b>29 ± 39</b> | <b>0.050</b> | <b>0.046</b> |
| fD, ng/ml                         | 2558 ± 1701      | 2544 ± 2468      | 0.97             | 0.94         | 2560 ± 1949     | 2539 ± 1092     | 0.95         | 0.53         | 2567 ± 1854    | 2335 ± 1029    | 0.70         | 0.57         |
| Classical, alternative and lectin |                  |                  |                  |              |                 |                 |              |              |                |                |              |              |
| C3, mg/dl                         | 132 ± 38         | 122 ± 49         | 0.17             | 0.051        | <b>134 ± 41</b> | <b>115 ± 31</b> | <b>0.003</b> | <b>0.004</b> | 131 ± 40       | 126 ± 38       | 0.63         | 0.69         |
| C3a, mg/dl                        | 39 ± 10          | 38 ± 12          | 0.74             | 0.23         | <b>39 ± 10</b>  | <b>35 ± 11</b>  | <b>0.008</b> | <b>0.028</b> | 39 ± 10        | 34 ± 10        | 0.097        | 0.051        |
| fH, ng/ml                         | 385 (291-559)    | 367 (227-579)    | 0.68             | 0.29         | 378 (280-550)   | 485 (302-640)   | 0.045        | 0.57         | 384 (284-559)  | 361 (269-623)  | 0.99         | 0.98         |
|                                   |                  |                  |                  |              |                 |                 |              |              |                |                |              |              |
|                                   | Lymphopenia      |                  | Thrombocytopenia |              |                 |                 |              |              |                |                |              |              |
|                                   | No=229           | Yes=41           | p                | p*           | No=238          | Yes=32          | p            | p*           |                |                |              |              |
| Classical pathway                 |                  |                  |                  |              |                 |                 |              |              |                |                |              |              |
| %                                 | <b>93 ± 37</b>   | <b>82 ± 42</b>   | <b>0.11</b>      | <b>0.033</b> | 90 ± 39         | 96 ± 33         | 0.45         | 0.67         |                |                |              |              |
| C1q, mg/dl                        | 34 ± 10          | 35 ± 13          | 0.53             | 0.64         | 34 ± 11         | 35 ± 10         | 0.63         | 0.41         |                |                |              |              |
| Lectin pathway                    |                  |                  |                  |              |                 |                 |              |              |                |                |              |              |
| %                                 | 9 (1-45)         | 21 (1-38)        | 0.51             | 0.99         | 9 (1-40)        | 27 (1-57)       | 0.18         | 0.27         |                |                |              |              |
| Classical and alternative         |                  |                  |                  |              |                 |                 |              |              |                |                |              |              |
| C2, mg/dl                         | <b>2.5 ± 1.2</b> | <b>2.2 ± 1.1</b> | <b>0.081</b>     | <b>0.037</b> | 2.5 ± 1.2       | 2.1 ± 1.1       | 0.057        | 0.050        |                |                |              |              |
| C4, mg/dl                         | 22 ± 12          | 17 ± 13          | 0.045            | 0.14         | <b>21 ± 12</b>  | <b>18 ± 13</b>  | <b>0.21</b>  | <b>0.049</b> |                |                |              |              |
| C1-inh, mg/dl                     | 32 ± 9           | 33 ± 6           | 0.65             | 0.98         | 32 ± 9          | 32 ± 9          | 0.83         | 0.59         |                |                |              |              |

| Alternative                            |                 |                 |              |              |                 |                 |              |              |
|----------------------------------------|-----------------|-----------------|--------------|--------------|-----------------|-----------------|--------------|--------------|
| %                                      | 51 ± 37         | 28 ± 33         | <0.001       | 0.003        | 47 ± 38         | 52 ± 36         | 0.45         | 0.67         |
| fD, ng/ml                              | 2509 ± 1713     | 2863 ± 2437     | 0.34         | 0.60         | 2549 ± 1905     | 2604 ± 1131     | 0.88         | 0.92         |
| Classical, alternative and lec-<br>tin |                 |                 |              |              |                 |                 |              |              |
| C3, mg/dl                              | <b>133 ± 41</b> | <b>114 ± 33</b> | <b>0.007</b> | <b>0.009</b> | <b>132 ± 41</b> | <b>116 ± 34</b> | <b>0.038</b> | <b>0.004</b> |
| C3a, mg/dl                             | 39 ± 10         | 37 ± 12         | 0.40         | 0.26         | 39 ± 10         | 37 ± 8          | 0.49         | 0.45         |
| fH, ng/ml                              | 381 (276-559)   | 465 (300-595)   | 0.79         | 0.97         | 382 (287-564)   | 474 (234-559)   | 0.70         | 0.69         |

\* Adjusted for age, sex, SLICC-DI (damage) and SLEDAI (activity) scores, as well as the use of aspirin, prednisone, methotrexate, azathioprine, and mycophenolate mofetil.

Anemia is defined as hemoglobin <11.9 g/dL (119 g/L) or hematocrit <35 percent in females and hemoglobin <13.6 g/dL (136 g/L) or hematocrit <40 percent in males.

Leukopenia: leucocytes <4000 cells/microl, neutropenia: neutrophils <1500 cells/microl, lymphopenia: lymphocytes <1000 cells/microl, thrombocytopenia: platelets <1500 cells/microl. Significant p values are depicted in bold.
